# Supplementary material for: Assessment of the Effects of Inhibition or Induction of CYP2C19 and CYP2C9 Enzymes, or Inhibition of OAT3, on the Pharmacokinetics of Abrocitinib and Its Metabolites in Healthy Individuals
Source: PubMed Central journal article supplement — Eur J Drug Metab Pharmacokinet. 2022 Feb 28;47(3):419–29. doi: 10.1007/s13318-021-00745-6 (PMC9050788; doi:10.1007/s13318-021-00745-6), 2022-02-28

**SUPPLEMENTARY MATERIAL FOR *EUROPEAN JOURNAL OF DRUG METABOLISM AND PHARMACOKINETICS***

**Assessment of the effects of inhibition or induction of CYP2C19 and CYP2C9 enzymes, or inhibition of OAT3, on the pharmacokinetics of abrocitinib and its metabolites in healthy individuals**

Xiaoxing Wang,<sup>1</sup> Martin E. Dowty,<sup>2</sup> Ann Wouters,<sup>1</sup> Svitlana Tatulych,<sup>1</sup> Carol Connell,<sup>1</sup> Vu H Le,<sup>1</sup> Sakambari Tripathy,<sup>1</sup> Melissa O'Gorman,<sup>1</sup> Jennifer A Winton,<sup>1</sup> Natalie Yin,<sup>3</sup> Hernan Valdez,<sup>3</sup> Bimal Malhotra<sup>3</sup>

<sup>1</sup>Pfizer Inc., Groton, CT, USA; <sup>2</sup>Pfizer Inc., Cambridge, MA, USA; <sup>3</sup>Pfizer Inc., New York, NY, USA

**Corresponding author:**

Bimal Malhotra, Pfizer Inc., New York, NY, USA

bimal.k.malhotra@pfizer.com

## **Pharmacokinetic Sampling**

Blood samples for pharmacokinetic analysis were collected into appropriately labeled tubes containing dipotassium ethylenediaminetetraacetic acid. Each blood collection tube was gently inverted 8-10 times to completely mix the blood. The blood sample was centrifuged as soon as possible for about 10 minutes at approximately 1700 ×g in a refrigerated centrifuge at 4°C to harvest the plasma. Using a new disposable transfer pipette for each time point, plasma was transferred into pre-labeled storage tubes that were stored at approximately –20°C or below within 60 minutes of collection. Samples were shipped on dry ice to the analytical laboratory.

In study NCT03634345, blood samples (3 mL) were collected to provide a minimum of 1 mL of plasma. For the fluvoxamine cohort, blood samples were collected at pre-dose (within 15 min prior to abrocitinib dosing), 0.5, 1, 2, 3, 4, 6, 8, 12, 24, 36 and 48 hours (only occurred if patients were discharged after completion of Period 1) post-dose on Period 1 Day 1, and pre-dose, 0.5, 1, 2, 3, 4, 6, 8, 12, 24, 36, and 48 hours post-dose on Period 2 Day 8. For the fluconazole cohort, blood samples were collected at pre-dose, 0.5, 1, 2, 3, 4, 6, 8, 12, 24, 36 and 48 hours (only occurred if patients were discharged after completion of Period 1), post-dose on Period 1 Day 1, and pre-dose, 0.5, 1, 2, 3, 4, 6, 8, 12, 24, 36, 48 and 72 hours post-dose on Period 2 Day 5.

In study NCT03637790 (rifampin study), blood samples (6 mL) were collected to provide approximately 2.5 mL of plasma. Blood samples were collected at pre-dose, 0.5, 1, 2, 3, 4, 6, 8, 10, 12, 16, and 24 hours post-dose on Period 1 Day 1 and Period 2 Day 8.

In study NCT03937258 (probenecid study), blood samples (10 mL) were collected to provide approximately 4 mL of plasma. Blood samples were collected pre-dose, 0.5, 1, 2, 3, 4, 6, 8, 10, 12, 24, 36, and 48 hours after dosing on Period 1 Day 1, Period 2 Day 4, and Period 3 Day 2.

**Table S1.** Summary of subject metabolizer status

|                                             | <b>Fluvoxamine<br/>cohort (N = 12)</b> | <b>Fluconazole<br/>cohort (N = 12)</b> | <b>Rifampin study<br/>(N = 12)</b> | <b>Probenecid<br/>study (N = 12)</b> |
|---------------------------------------------|----------------------------------------|----------------------------------------|------------------------------------|--------------------------------------|
| <b>CYP2C19 metabolizer status, <i>n</i></b> |                                        |                                        |                                    |                                      |
| <b>Ultra-rapid metabolizer</b>              | 1                                      | 1                                      | 0                                  | 0                                    |
| <b>Rapid metabolizer</b>                    | 2                                      | 2                                      | 2                                  | 4                                    |
| <b>Extensive metabolizer</b>                | 5                                      | 4                                      | 7                                  | 5                                    |
| <b>Intermediate metabolizer</b>             | 4                                      | 5                                      | 2                                  | 3                                    |
| <b>Poor metabolizer</b>                     | 0                                      | 0                                      | 1                                  | 0                                    |
| <b>CYP2C9 metabolizer status, <i>n</i></b>  |                                        |                                        |                                    |                                      |
| <b>Rapid metabolizer</b>                    | 0                                      | 0                                      | 0                                  | 0                                    |
| <b>Extensive metabolizer</b>                | 9                                      | 7                                      | 7                                  | 10                                   |
| <b>Intermediate metabolizer</b>             | 3                                      | 4                                      | 5                                  | 2                                    |
| <b>Poor metabolizer</b>                     | 0                                      | 1                                      | 0                                  | 0                                    |

**Table S2.** Summary of pharmacokinetics parameters for abrocitinib parent drug and active moiety in the presence and absence of fluvoxamine

|                                        | <b>Abrocitinib 100 mg<br/>single dose (N = 12)</b> | <b>Abrocitinib 100 mg<br/>single dose +<br/>fluvoxamine 50 mg<br/>QD<br/>(N = 12)</b> | <b>Abrocitinib 100 mg<br/>single dose (N = 12)</b> | <b>Abrocitinib 100 mg<br/>single dose +<br/>fluvoxamine 50 mg<br/>QD<br/>(N = 12)</b> |
|----------------------------------------|----------------------------------------------------|---------------------------------------------------------------------------------------|----------------------------------------------------|---------------------------------------------------------------------------------------|
|                                        | <b>Total abrocitinib pharmacokinetics</b>          |                                                                                       | <b>Unbound active moiety pharmacokinetics</b>      |                                                                                       |
| <b>AUC<sub>inf</sub>,<br/>ng·h/mL</b>  | 1578 (21)                                          | 4343 (30)                                                                             | 3500 (10)                                          | 6703 (24)                                                                             |
| <b>AUC<sub>last</sub>,<br/>ng·h/mL</b> | 1551 (21)                                          | 4308 (30)                                                                             | 3313 (11)                                          | 6374 (25)                                                                             |
| <b>C<sub>max</sub>,<br/>ng/mL</b>      | 420.2 (50)                                         | 775.0 (48)                                                                            | 807.4 (43)                                         | 1074 (48)                                                                             |
| <b>T<sub>max</sub>, h</b>              | 1.00 (0.500–2.02)                                  | 0.750 (0.5003.00)–                                                                    |                                                    |                                                                                       |
| <b>t<sub>1/2</sub>, h</b>              | 4.332 ± 2.7930                                     | 5.181 ± 2.2197                                                                        |                                                    |                                                                                       |
| <b>CL/F,<br/>mL/min</b>                | 63.41 (21)                                         | 23.03 (30)                                                                            |                                                    |                                                                                       |
| <b>V<sub>Z</sub>/F, L</b>              | 323.3 (70)                                         | 156.7 (54)                                                                            |                                                    |                                                                                       |

Data are expressed as geometric mean (geometric % coefficient of variation) for all except T<sub>max</sub> and t<sub>1/2</sub>. T<sub>max</sub> is median (range) and t<sub>1/2</sub> is arithmetic mean ± standard deviation.

AUC<sub>inf</sub>, area under the concentration-time curve from time 0 to infinity; AUC<sub>last</sub>, area under the concentration-time curve from time 0 to the time of last quantifiable concentration; CL/F, apparent oral clearance; C<sub>max</sub>, maximum observed plasma concentration; QD, once daily; T<sub>max</sub>, time for C<sub>max</sub>; t<sub>1/2</sub>, terminal plasma half-life; V<sub>Z</sub>/F, apparent volume of distribution following oral administration.

N = Total number of participants in the treatment group in the indicated population.

**Table S3.** Summary of pharmacokinetics parameters for abrocitinib parent drug and active moiety in the presence and absence of fluconazole

|                                        | <b>Abrocitinib 100 mg<br/>single dose (N = 12)</b> | <b>Abrocitinib 100 mg<br/>single dose +<br/>fluconazole 200 mg<br/>QD<br/>(N = 12)</b> | <b>Abrocitinib 100 mg<br/>single dose (N = 12)</b> | <b>Abrocitinib 100 mg<br/>single dose +<br/>fluconazole 200 mg<br/>QD<br/>(N = 12)</b> |
|----------------------------------------|----------------------------------------------------|----------------------------------------------------------------------------------------|----------------------------------------------------|----------------------------------------------------------------------------------------|
|                                        | <b>Total abrocitinib pharmacokinetics</b>          |                                                                                        | <b>Unbound active moiety pharmacokinetics</b>      |                                                                                        |
| <b>AUC<sub>inf</sub>,<br/>ng·h/mL</b>  | 1549 (75)                                          | 7482 (36)                                                                              | 3359 (41)                                          | 7959 (-)                                                                               |
| <b>AUC<sub>last</sub>,<br/>ng·h/mL</b> | 1537 (75)                                          | 7453 (36)                                                                              | 3244 (42)                                          | 8879 (33)                                                                              |
| <b>C<sub>max</sub>,<br/>ng/mL</b>      | 519.8 (79)                                         | 998.5 (38)                                                                             | 960.3 (54)                                         | 1186 (36)                                                                              |
| <b>T<sub>max</sub>, h</b>              | 0.525 (0.500–2.02)                                 | 1.00 (0.500–2.00)                                                                      |                                                    |                                                                                        |
| <b>t<sub>1/2</sub>, h</b>              | 3.094 ± 1.3542                                     | 6.142 ± 1.1937                                                                         |                                                    |                                                                                        |
| <b>CL/F,<br/>mL/min</b>                | 64.53 (75)                                         | 13.36 (35)                                                                             |                                                    |                                                                                        |
| <b>V<sub>Z</sub>/F, L</b>              | 263.7 (57)                                         | 116.6 (29)                                                                             |                                                    |                                                                                        |

Data are expressed as geometric mean (geometric % coefficient of variation) for all except T<sub>max</sub> and t<sub>1/2</sub>. T<sub>max</sub> is median (range) and t<sub>1/2</sub> is arithmetic mean ± standard deviation.

AUC<sub>inf</sub>, area under the concentration-time curve from time 0 to infinity; AUC<sub>last</sub>, area under the concentration-time curve from time 0 to the time of last quantifiable concentration; CL/F, apparent oral clearance; C<sub>max</sub>, maximum observed plasma concentration; QD, once daily; T<sub>max</sub>, time for C<sub>max</sub>; t<sub>1/2</sub>, terminal plasma half-life; V<sub>Z</sub>/F, apparent volume of distribution following oral administration.

N = Total number of participants in the treatment group in the indicated population.

**Table S4.** Summary of pharmacokinetics parameters for abrocitinib parent drug and active moiety in the presence and absence of rifampin

|                                        | <b>Abrocitinib 200 mg<br/>single dose (<i>N</i> = 12,<br/><i>n</i> = 10)</b> | <b>Abrocitinib 200 mg<br/>single dose +<br/>Rifampin 600 mg<br/>QD<br/>(<i>N</i> = 12, <i>n</i> = 12)</b> | <b>Abrocitinib 200 mg<br/>single dose (<i>N</i> = 12,<br/><i>n</i> = 10)</b> | <b>Abrocitinib 200 mg<br/>single dose +<br/>Rifampin 600 mg<br/>QD<br/>(<i>N</i> = 12, <i>n</i> = 12)</b> |
|----------------------------------------|------------------------------------------------------------------------------|-----------------------------------------------------------------------------------------------------------|------------------------------------------------------------------------------|-----------------------------------------------------------------------------------------------------------|
|                                        | <b>Total abrocitinib pharmacokinetics</b>                                    |                                                                                                           | <b>Unbound active moiety pharmacokinetics</b>                                |                                                                                                           |
| <b>AUC<sub>inf</sub>,<br/>ng·h/mL</b>  | 3883 (44)                                                                    | 468.7 (82)                                                                                                | 7829 (22)                                                                    | 3374 (22)                                                                                                 |
| <b>AUC<sub>last</sub>,<br/>ng·h/mL</b> | 3593 (48)                                                                    | 462.2 (82)                                                                                                | 7311 (30)                                                                    | 3291 (23)                                                                                                 |
| <b>C<sub>max</sub>,<br/>ng/mL</b>      | 934.5 (72)                                                                   | 194.9 (92)                                                                                                | 1621 (67)                                                                    | 1117 (44)                                                                                                 |
| <b>T<sub>max</sub>, h</b>              | 0.750 (0.500–2.10)                                                           | 1.00 (0.500–1.00)                                                                                         |                                                                              |                                                                                                           |
| <b>t<sub>1/2</sub>, h</b>              | 4.270 ± 2.7210                                                               | 2.144 ± 1.4279                                                                                            |                                                                              |                                                                                                           |
| <b>CL/F,<br/>L/hr</b>                  | 51.50 (44)                                                                   | 426.6 (82)                                                                                                |                                                                              |                                                                                                           |
| <b>V<sub>Z</sub>/F, L</b>              | 270.3 (81)                                                                   | 1127 (90)                                                                                                 |                                                                              |                                                                                                           |

Data are expressed as geometric mean (geometric % coefficient of variation) for all except T<sub>max</sub> and t<sub>1/2</sub>. T<sub>max</sub> is median (range) and t<sub>1/2</sub> is arithmetic mean ± standard deviation.

AUC<sub>inf</sub>, area under the concentration-time curve from time 0 to infinity; AUC<sub>last</sub>, area under the concentration-time curve from time 0 to the time of last quantifiable concentration; CL/F, apparent oral clearance; C<sub>max</sub>, maximum observed plasma concentration; QD, once daily; T<sub>max</sub>, time for C<sub>max</sub>; t<sub>1/2</sub>, terminal plasma half-life; V<sub>Z</sub>/F, apparent volume of distribution following oral administration.

*N* = Total number of participants in the treatment group in the indicated population.

*n* = Total number of participants contributing to the summary statistics for t<sub>1/2</sub>, AUC<sub>inf</sub>, CL/F and V<sub>Z</sub>/F.

**Table S5.** Summary of pharmacokinetics parameters for abrocitinib parent drug and active moiety in the presence and absence of probenecid

|                                        | <b>Abrocitinib 200 mg<br/>single dose (N = 12)</b> | <b>Abrocitinib 200 mg<br/>single dose +<br/>Probenecid 1000 mg<br/>BID<br/>(N = 12)</b> | <b>Abrocitinib 200 mg<br/>single dose (N = 12)</b> | <b>Abrocitinib 200 mg<br/>single dose +<br/>Probenecid 1000 mg<br/>BID<br/>(N = 12)</b> |
|----------------------------------------|----------------------------------------------------|-----------------------------------------------------------------------------------------|----------------------------------------------------|-----------------------------------------------------------------------------------------|
|                                        | <b>Total abrocitinib pharmacokinetics</b>          |                                                                                         | <b>Unbound active moiety pharmacokinetics</b>      |                                                                                         |
| <b>AUC<sub>inf</sub>,<br/>ng·h/mL</b>  | 3902 (26)                                          | 4020 (69)                                                                               | 7968 (16)                                          | 11390 (40)                                                                              |
| <b>AUC<sub>last</sub>,<br/>ng·h/mL</b> | 3189 (57)                                          | 4003 (69)                                                                               | 6739 (35)                                          | 11120 (41)                                                                              |
| <b>C<sub>max</sub>,<br/>ng/mL</b>      | 756.5 (60)                                         | 918.2 (64)                                                                              | 1410 (56)                                          | 1835 (44)                                                                               |
| <b>T<sub>max</sub>, h</b>              | 1.00 (0.500–4.00)                                  | 2.00 (0.500–4.00)                                                                       |                                                    |                                                                                         |
| <b>t<sub>1/2</sub>, h</b>              | 5.907 ± 3.0829                                     | 4.339 ± 2.6190                                                                          |                                                    |                                                                                         |
| <b>CL/F,<br/>L/hr</b>                  | 51.24 (26)                                         | 49.75 (69)                                                                              |                                                    |                                                                                         |
| <b>V<sub>Z</sub>/F, L</b>              | 375.2 (62)                                         | 261.3 (87)                                                                              |                                                    |                                                                                         |

Data are expressed as geometric mean (geometric % coefficient of variation) for all except T<sub>max</sub> and t<sub>1/2</sub>. T<sub>max</sub> is median (range) and t<sub>1/2</sub> is arithmetic mean ± standard deviation.

AUC<sub>inf</sub>, area under the concentration-time curve from time 0 to infinity; AUC<sub>last</sub>, area under the concentration-time curve from time 0 to the time of last quantifiable concentration; CL/F, apparent oral clearance; C<sub>max</sub>, maximum observed plasma concentration; QD, once daily; T<sub>max</sub>, time for C<sub>max</sub>; t<sub>1/2</sub>, terminal plasma half-life; V<sub>Z</sub>/F, apparent volume of distribution following oral administration.

**Table S6.** Influence of fluvoxamine on the pharmacokinetics of abrocitinib metabolites M1, M2, and M4

|                                        | <b>Abrocitinib 100 mg<br/>single dose (N = 12)</b> | <b>Abrocitinib 100 mg<br/>single dose +<br/>fluvoxamine 200 mg<br/>QD<br/>(N = 12)</b> | <b>Abrocitinib 100 mg<br/>single dose (N = 12)</b> | <b>Abrocitinib 100 mg<br/>single dose +<br/>fluvoxamine 200 mg<br/>QD<br/>(N = 12)</b> | <b>Abrocitinib 100 mg<br/>single dose (N = 12)</b> | <b>Abrocitinib 100 mg<br/>single dose +<br/>fluvoxamine 200 mg<br/>QD<br/>(N = 12)</b> |
|----------------------------------------|----------------------------------------------------|----------------------------------------------------------------------------------------|----------------------------------------------------|----------------------------------------------------------------------------------------|----------------------------------------------------|----------------------------------------------------------------------------------------|
|                                        | <b>M1</b>                                          |                                                                                        | <b>M2</b>                                          |                                                                                        | <b>M4</b>                                          |                                                                                        |
| <b>AUC<sub>inf</sub>,<br/>ng·h/mL</b>  | 565.6 (19)                                         | 452.0 (28)                                                                             | 532.9 (17)                                         | 630.8 (19)                                                                             | 807.3 (20)                                         | 1080 (25)                                                                              |
| <b>AUC<sub>last</sub>,<br/>ng·h/mL</b> | 548.2 (19)                                         | 420.4 (29)                                                                             | 482.0 (20)                                         | 511.5 (23)                                                                             | 793.7 (21)                                         | 1060 (26)                                                                              |
| <b>C<sub>max</sub>,<br/>ng/mL</b>      | 138.6 (49)                                         | 57.68 (76)                                                                             | 95.83 (47)                                         | 68.32 (47)                                                                             | 147.4 (47)                                         | 131.3 (50)                                                                             |
| <b>t<sub>1/2</sub>, h</b>              | 4.348 ± 2.7452                                     | 5.739 ± 2.4642                                                                         | 2.862 ± 0.55279                                    | 4.776 ± 2.4429                                                                         | 4.748 ± 2.4240                                     | 6.161 ± 2.6169                                                                         |

Data are expressed as geometric mean (geometric % coefficient of variation) for all except t<sub>1/2</sub>. t<sub>1/2</sub> is arithmetic mean ± standard deviation.

AUC<sub>inf</sub>, area under the concentration-time curve from time 0 to infinity; AUC<sub>last</sub>, area under the concentration-time curve from time 0 to the time of last quantifiable concentration; C<sub>max</sub>, maximum observed plasma concentration; QD, once daily; t<sub>1/2</sub>, terminal plasma half-life.



**Table S7.** Influence of fluconazole on the pharmacokinetics of abrocitinib metabolites M1, M2, and M4

|                                        | Abrocitinib 100 mg<br>single dose ( <i>N</i> = 12) | Abrocitinib 100 mg<br>single dose +<br>fluconazole 200 mg<br>QD<br>( <i>N</i> = 12) | Abrocitinib 100 mg<br>single dose ( <i>N</i> = 12) | Abrocitinib 100 mg<br>single dose +<br>fluconazole 200 mg<br>QD<br>( <i>N</i> = 12) | Abrocitinib 100 mg<br>single dose ( <i>N</i> = 12) | Abrocitinib 100 mg<br>single dose +<br>fluconazole 200 mg<br>QD<br>( <i>N</i> = 12) |
|----------------------------------------|----------------------------------------------------|-------------------------------------------------------------------------------------|----------------------------------------------------|-------------------------------------------------------------------------------------|----------------------------------------------------|-------------------------------------------------------------------------------------|
|                                        | M1                                                 |                                                                                     | M2                                                 |                                                                                     | M4                                                 |                                                                                     |
| <b>AUC<sub>inf</sub>,<br/>ng·h/mL</b>  | 481.7 (21)                                         | 135.8 (31)                                                                          | 468.0 (24)                                         | 289.0 (-) <sup>a</sup>                                                              | 713.9 (40)                                         | 1385 (26)                                                                           |
| <b>AUC<sub>last</sub>,<br/>ng·h/mL</b> | 467.6 (21)                                         | 91.84 (45)                                                                          | 428.6 (26)                                         | 177.0 (49)                                                                          | 695.1 (41)                                         | 1368 (27)                                                                           |
| <b>C<sub>max</sub>,<br/>ng/mL</b>      | 144.5 (49)                                         | 13.73 (47)                                                                          | 99.77 (41)                                         | 23.77 (50)                                                                          | 161.7 (51)                                         | 128.7 (40)                                                                          |
| <b>t<sub>1/2</sub>, h</b>              | 3.100 ± 1.1892                                     | 5.792 ± 1.9266                                                                      | 2.790 ± 0.54413                                    | 4.630 <sup>a</sup>                                                                  | 3.551 ± 1.2132                                     | 6.867 ± 1.1639                                                                      |

Data are expressed as geometric mean (% coefficient of variation) for all except t<sub>1/2</sub>. t<sub>1/2</sub> is arithmetic mean ± standard deviation. <sup>a</sup>*n* = 1 for these t<sub>1/2</sub> and AUC<sub>inf</sub> calculations.

AUC<sub>inf</sub>, area under the concentration-time curve from time 0 to infinity; AUC<sub>last</sub>, area under the concentration-time curve from time 0 to the time of last quantifiable concentration; C<sub>max</sub>, maximum observed plasma concentration; QD, once daily; t<sub>1/2</sub>, terminal plasma half-life.

**Table S8.** Influence of rifampin on the pharmacokinetics of abrocitinib metabolites M1, M2, and M4

|                                        | Abrocitinib 200 mg<br>single dose ( <i>N</i> = 12) | Abrocitinib 200 mg<br>single dose +<br>Rifampin 600 mg<br>QD<br>( <i>N</i> = 12) | Abrocitinib 200 mg<br>single dose ( <i>N</i> = 12) | Abrocitinib 200 mg<br>single dose +<br>Rifampin 600 mg<br>QD<br>( <i>N</i> = 12) | Abrocitinib 200 mg<br>single dose ( <i>N</i> = 12) | Abrocitinib 200 mg<br>single dose +<br>Rifampin 600 mg<br>QD<br>( <i>N</i> = 12) |
|----------------------------------------|----------------------------------------------------|----------------------------------------------------------------------------------|----------------------------------------------------|----------------------------------------------------------------------------------|----------------------------------------------------|----------------------------------------------------------------------------------|
|                                        | M1                                                 |                                                                                  | M2                                                 |                                                                                  | M4                                                 |                                                                                  |
| <b>AUC<sub>inf</sub>,<br/>ng·h/mL</b>  | 824.9 (45)                                         | 810.1 (43)                                                                       | 1207 (16)                                          | 872.3 (16)                                                                       | 2048 (29)                                          | 864.8 (38)                                                                       |
| <b>AUC<sub>last</sub>,<br/>ng·h/mL</b> | 810.2 (44)                                         | 800.2 (43)                                                                       | 1044 (29)                                          | 842.9 (18)                                                                       | 1760 (35)                                          | 854.8 (38)                                                                       |
| <b>C<sub>max</sub>,<br/>ng/mL</b>      | 194.0 (82)                                         | 326.6 (71)                                                                       | 171.1 (73)                                         | 248.9 (43)                                                                       | 306.7 (77)                                         | 265.6 (49)                                                                       |
| <b>t<sub>1/2</sub>, h</b>              | 4.202 ± 2.5635                                     | 2.984 ± 1.5784                                                                   | 4.332 ± 3.2071                                     | 2.633 ± 1.5052                                                                   | 4.451 ± 2.1802                                     | 2.908 ± 1.5808                                                                   |

Data are expressed as geometric mean (geometric % coefficient of variation) for all except t<sub>1/2</sub>. t<sub>1/2</sub> is arithmetic mean ± standard deviation.

AUC<sub>inf</sub>, area under the concentration-time curve from time 0 to infinity; AUC<sub>last</sub>, area under the concentration-time curve from time 0 to the time of last quantifiable concentration; C<sub>max</sub>, maximum observed plasma concentration; QD, once daily; t<sub>1/2</sub>, terminal plasma half-life.

**Table S9.** Influence of probenecid on the pharmacokinetics of abrocitinib metabolites M1, M2, and M4

|                                        | <b>Abrocitinib 200 mg<br/>single dose (N = 12)</b> | <b>Abrocitinib 200 mg<br/>single dose +<br/>Probenecid 1000 mg<br/>BID<br/>(N = 12)</b> | <b>Abrocitinib 200 mg<br/>single dose (N = 12)</b> | <b>Abrocitinib 200 mg<br/>single dose +<br/>Probenecid 1000 mg<br/>BID<br/>(N = 12)</b> | <b>Abrocitinib 200 mg<br/>single dose (N = 12)</b> | <b>Abrocitinib 200 mg<br/>single dose +<br/>Probenecid 1000 mg<br/>BID<br/>(N = 12)</b> |
|----------------------------------------|----------------------------------------------------|-----------------------------------------------------------------------------------------|----------------------------------------------------|-----------------------------------------------------------------------------------------|----------------------------------------------------|-----------------------------------------------------------------------------------------|
|                                        | <b>M1</b>                                          |                                                                                         | <b>M2</b>                                          |                                                                                         | <b>M4</b>                                          |                                                                                         |
| <b>AUC<sub>inf</sub>,<br/>ng·h/mL</b>  | 998.5 (48)                                         | 1742 (42)                                                                               | 1197 (23)                                          | 2157 (42)                                                                               | 2042 (14)                                          | 3756 (47)                                                                               |
| <b>AUC<sub>last</sub>,<br/>ng·h/mL</b> | 978.9 (40)                                         | 1712 (43)                                                                               | 948.5 (36)                                         | 2050 (45)                                                                               | 1719 (40)                                          | 3709 (48)                                                                               |
| <b>C<sub>max</sub>,<br/>ng/mL</b>      | 210.2 (86)                                         | 287.3 (57)                                                                              | 162.1 (65)                                         | 218.2 (50)                                                                              | 287.8 (60)                                         | 416.8 (51)                                                                              |
| <b>t<sub>1/2</sub>, h</b>              | 4.153 ± 2.6427                                     | 6.011 ± 3.4644                                                                          | 3.899 ± 2.2215                                     | 7.007 ± 3.1531                                                                          | 4.953 ± 2.4198                                     | 6.928 ± 2.3519                                                                          |

Data are expressed as geometric mean (geometric % coefficient of variation) for all except t<sub>max</sub> and t<sub>1/2</sub>. t<sub>max</sub> is median (range) and t<sub>1/2</sub> is arithmetic mean ± standard deviation.

AUC<sub>inf</sub>, area under the concentration-time curve from time 0 to infinity; AUC<sub>last</sub>, area under the concentration-time curve from time 0 to the time of last quantifiable concentration; C<sub>max</sub>, maximum observed plasma concentration; QD, once daily; t<sub>1/2</sub>, terminal plasma half-life, t<sub>max</sub>, time to C<sub>max</sub>.

**Table S10.** Ratio of the unadjusted geometric means for abrocitinib metabolites M1, M2, M4 to parent drug for  $C_{max}$  in the presence of fluvoxamine, fluconazole, rifampin, and probenecid

|                              | M1/parent |         |          | M2/parent |         |          | M4/parent |        |          |
|------------------------------|-----------|---------|----------|-----------|---------|----------|-----------|--------|----------|
|                              | Ref       | Test    | Test/Ref | Ref       | Test    | Test/Ref | Ref       | Test   | Test/Ref |
| <b>Effect of fluvoxamine</b> | 0.3142    | 0.07092 | 0.2257   | 0.2173    | 0.08402 | 0.3868   | 0.3344    | 0.1614 | 0.4828   |
| <b>Effect of fluconazole</b> | 0.2649    | 0.01309 | 0.04941  | 0.1829    | 0.02268 | 0.1240   | 0.2962    | 0.1228 | 0.4144   |
| <b>Effect of rifampin</b>    | 0.1978    | 1.597   | 8.074    | 0.1744    | 1.217   | 6.977    | 0.3128    | 1.299  | 4.153    |
| <b>Effect of probenecid</b>  | 0.2650    | 0.2981  | 1.125    | 0.2041    | 0.2264  | 1.109    | 0.3626    | 0.4323 | 1.192    |

Ref represents the reference value for a single dose of abrocitinib. Test represents a single dose of abrocitinib in the presence of fluvoxamine, fluconazole, rifampin, or probenecid.

**Table S11.** Ratio of the unadjusted geometric means for abrocitinib metabolites M1, M2, M4 to parent drug for AUC<sub>inf</sub> in the presence of fluvoxamine, fluconazole, rifampin, and probenecid

|                              | M1/parent |         |          | M2/parent |         |          | M4/parent |        |          |
|------------------------------|-----------|---------|----------|-----------|---------|----------|-----------|--------|----------|
|                              | Ref       | Test    | Test/Ref | Ref       | Test    | Test/Ref | Ref       | Test   | Test/Ref |
| <b>Effect of fluvoxamine</b> | 0.3419    | 0.09643 | 0.2820   | 0.3173    | 0.1389  | 0.4379   | 0.4880    | 0.2370 | 0.4857   |
| <b>Effect of fluconazole</b> | 0.2961    | 0.01755 | 0.05927  | 0.2878    | 0.04270 | 0.1484   | 0.4388    | 0.1764 | 0.4019   |
| <b>Effect of rifampin</b>    | 0.2025    | 1.648   | 8.137    | 0.3132    | 1.773   | 5.660    | 0.5279    | 1.759  | 3.332    |
| <b>Effect of probenecid</b>  | 0.2435    | 0.4129  | 1.695    | 0.2992    | 0.5114  | 1.709    | 0.5052    | 0.8904 | 1.763    |

Ref represents the reference value for a single dose of abrocitinib. Test represents a single dose of abrocitinib in the presence of fluvoxamine, fluconazole, rifampin, or probenecid.

**Table S12.** Summary of pharmacokinetics parameters for abrocitinib parent drug, metabolites M1, M2, and M4, and active moiety with single or multiple dosing of abrocitinib

|                                            | <b>Abrocitinib<br/>200 mg<br/>single dose<br/>(N = 12)</b> | <b>Abrocitinib<br/>200 mg once<br/>daily dose<br/>(N = 12)</b> | <b>Abrocitinib<br/>200 mg<br/>single dose<br/>(N = 12)</b> | <b>Abrocitinib<br/>200 mg once<br/>daily dose<br/>(N = 12)</b> | <b>Abrocitinib<br/>200 mg<br/>single dose<br/>(N = 12)</b> | <b>Abrocitinib<br/>200 mg once<br/>daily dose<br/>(N = 12)</b> | <b>Abrocitinib<br/>200 mg<br/>single dose<br/>(N = 12)</b> | <b>Abrocitinib<br/>200 mg once<br/>daily dose<br/>(N = 12)</b> | <b>Abrocitinib<br/>200 mg<br/>single dose<br/>(N = 12)</b> | <b>Abrocitinib<br/>200 mg once<br/>daily dose<br/>(N = 12)</b> |
|--------------------------------------------|------------------------------------------------------------|----------------------------------------------------------------|------------------------------------------------------------|----------------------------------------------------------------|------------------------------------------------------------|----------------------------------------------------------------|------------------------------------------------------------|----------------------------------------------------------------|------------------------------------------------------------|----------------------------------------------------------------|
|                                            | <b>Parent drug</b>                                         |                                                                | <b>M1</b>                                                  |                                                                | <b>M2</b>                                                  |                                                                | <b>M4</b>                                                  |                                                                | <b>Active moiety</b>                                       |                                                                |
| <b>AUC<sub>tau</sub>,<br/>ng·h/m<br/>L</b> | 3092 (55)                                                  | 4752 (57)                                                      | 956.3 (43)                                                 | 869.1 (42)                                                     | 968.3 (38)                                                 | 1020 (30)                                                      | 1644 (40)                                                  | 2171 (32)                                                      | 6634 (35)                                                  | 8693 (35)                                                      |
| <b>C<sub>max</sub>,<br/>ng/mL</b>          | 756.5 (60)                                                 | 1184 (44)                                                      | 210.2 (86)                                                 | 193.7 (60)                                                     | 162.1 (65)                                                 | 166.9 (44)                                                     | 287.8 (60)                                                 | 386.7 (29)                                                     | 1410 (56)                                                  | 1927 (28)                                                      |
| <b>T<sub>max</sub>, h</b>                  | 1.00 (0.500–<br>4.00)                                      | 1.50 (0.500–<br>3.00)                                          | 1.00 (0.500–<br>4.00)                                      | 1.50 (0.500–<br>3.00)                                          | 2.00 (0.500–<br>4.00)                                      | 2.00 (0.500–<br>4.00)                                          | 2.00 (0.500–<br>4.00)                                      | 2.00 (0.500–<br>3.00)                                          | -                                                          | -                                                              |
| <b>t<sub>1/2</sub>, h</b>                  | 5.907 ±<br>3.0829                                          | 5.958 ±<br>4.4495                                              | 4.153 ±<br>2.6427                                          | 6.265 ±<br>4.6527                                              | 3.899 ±<br>2.2215                                          | 4.556 ±<br>2.1682                                              | 4.953 ±<br>2.4198                                          | 5.827 ±<br>2.5947                                              | -                                                          | -                                                              |
| <b>R<sub>ac</sub></b>                      | -                                                          | 1.537 (22)                                                     | -                                                          | 0.9094 (14)                                                    | -                                                          | 1.053 (15)                                                     | -                                                          | 1.322 (17)                                                     | -                                                          | 1.165 (12)                                                     |
| <b>R<sub>ac,Cmax</sub></b>                 | -                                                          | 1.565 (46)                                                     | -                                                          | 0.9212 (33)                                                    | -                                                          | 1.030 (34)                                                     | -                                                          | 1.342 (36)                                                     | -                                                          | 1.309 (19)                                                     |
| <b>R<sub>ss</sub></b>                      | -                                                          | 1.468 (20)                                                     | -                                                          | 0.8513 (13)                                                    | -                                                          | 0.9911 (16)                                                    | -                                                          | 1.183 (12)                                                     | -                                                          | 1.367 (43)                                                     |

Data are expressed as geometric mean (geometric % coefficient of variation) for all except T<sub>max</sub> and t<sub>1/2</sub>. T<sub>max</sub> is median (range) and t<sub>1/2</sub> is arithmetic mean ± standard deviation.

AUC<sub>tau</sub>, area under the concentration-time curve from time 0 to time tau (24 hours for QD dosing); C<sub>max</sub>, maximum observed plasma concentration; QD, once daily; R<sub>ac</sub>, observed accumulation ratio; R<sub>ac,Cmax</sub>, observed accumulation ratio for C<sub>max</sub>; R<sub>ss</sub>, observed steady-state accumulation ratio; t<sub>1/2</sub>, terminal plasma half-life, T<sub>max</sub>, time to C<sub>max</sub>.

**Table S13.** Ratio of the unadjusted geometric means for abrocitinib metabolites M1, M2, M4 to parent drug for  $C_{max}$  and  $AUC_{tau}$  with single or multiple dosing of abrocitinib

|             | M1/parent |        |          | M2/parent |        |          | M4/parent |        |          |
|-------------|-----------|--------|----------|-----------|--------|----------|-----------|--------|----------|
|             | Ref       | Test   | Test/Ref | Ref       | Test   | Test/Ref | Ref       | Test   | Test/Ref |
| $C_{max}$   | 0.2650    | 0.1558 | 0.5879   | 0.2041    | 0.1344 | 0.6583   | 0.3626    | 0.3113 | 0.8585   |
| $AUC_{tau}$ | 0.2945    | 0.1744 | 0.5921   | 0.2984    | 0.2046 | 0.6856   | 0.5062    | 0.4356 | 0.8605   |

Ref represents the reference value for a single dose of abrocitinib 200 mg. Test represents a daily dose of abrocitinib 200 mg.

$AUC_{tau}$ , area under the concentration-time curve from time 0 to time tau (24 hours for QD dosing);  $C_{max}$ , maximum observed plasma concentration

## Figure legend

**Figure S1.** Median plasma concentration-time curves for abrocitinib parent drug (**A**) and metabolites M1 (**B**), M2 (**C**), and M4 (**D**) with single and multiple dosing of abrocitinib. QD, once daily [multiple dosing]; SD, single dose.



Figure S1

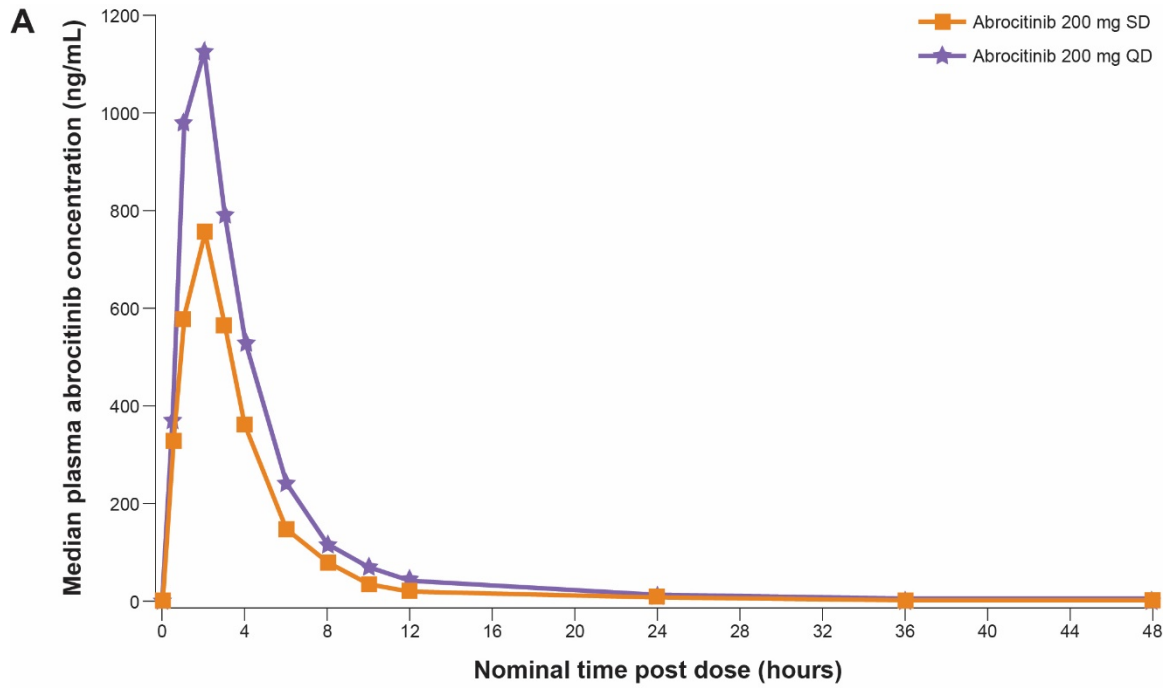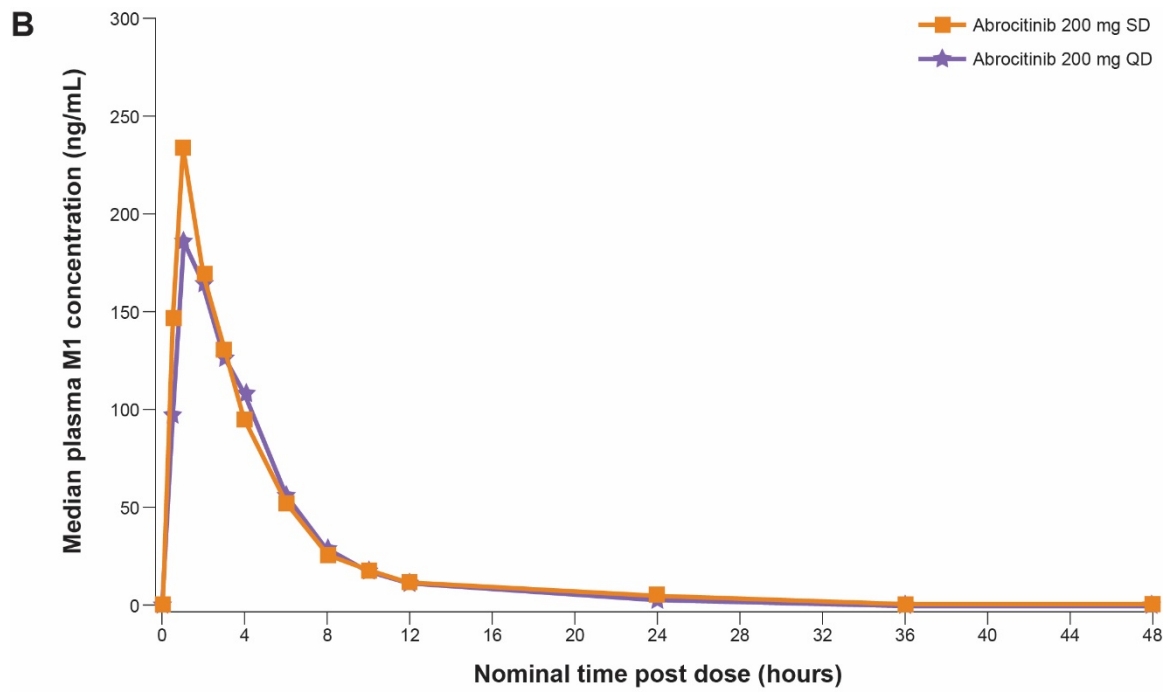

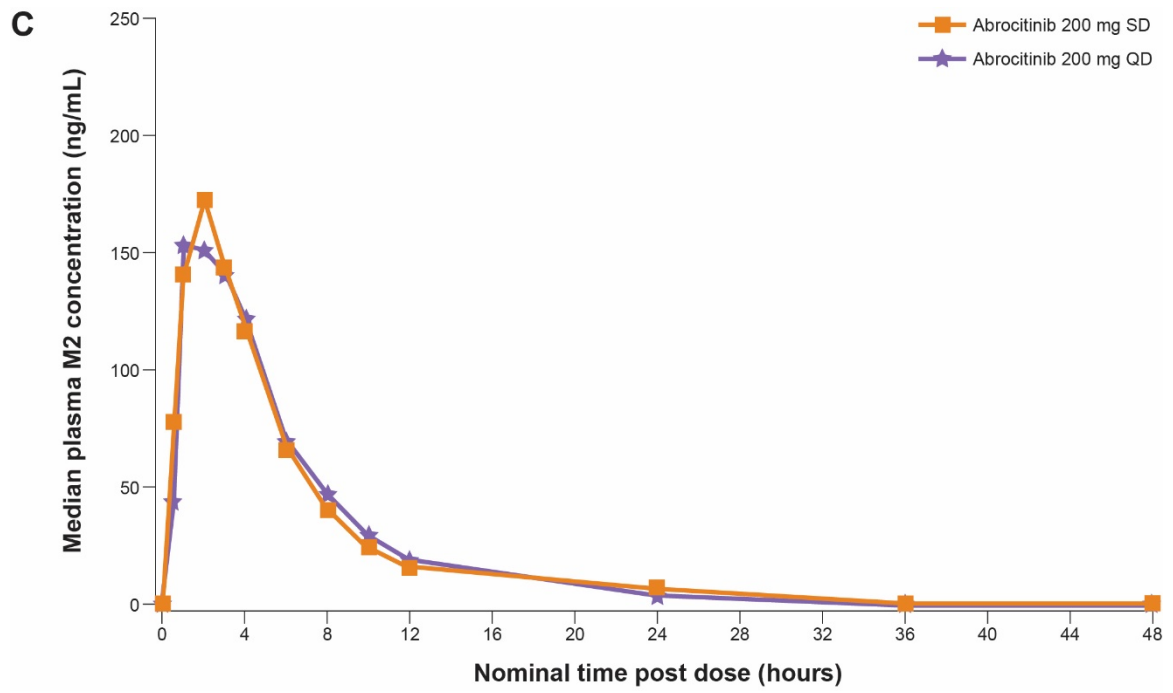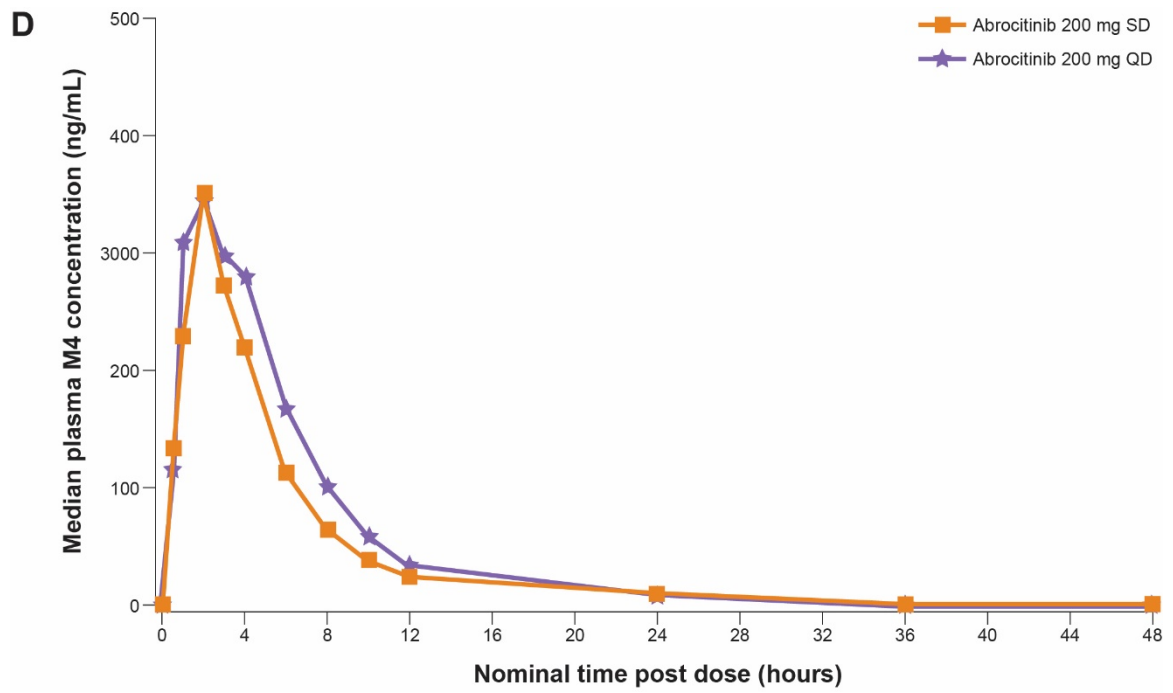

Supplement: 13318_2021_745_MOESM1_ESM.pdf [file 13318_2021_745_MOESM1_ESM.pdf]
